# Supplementary material for: Genome-wide identification and expression analysis of GA20ox and GA3ox genes during pod development in peanut
Source: PeerJ. 2023 Oct 26;11:e16279. doi: 10.7717/peerj.16279 (PMC10615029; doi:10.7717/peerj.16279)
Supplement: Table S5 [file peerj-11-16279-s005.xlsx]

## Sheet: Chromosome localization
Table S5 Chromosomal location data
Gene ID	Chromosome	Chromosome length	Starting position	Termination position
AhGA20ox1	2	102981163	97690029	97691701
AhGA20ox2	2	102981163	96604690	96607901
AhGA20ox3	12	120579088	113166043	113169326
AhGA20ox4	12	120579088	114222593	114239003
AhGA20ox5	3	143813506	119800432	119803515
AhGA20ox6	13	146725006	122485314	122488074
AhGA20ox7	4	128801742	112865431	112867614
AhGA20ox8	14	143237272	124190304	124192407
AhGA20ox9	5	115930344	111807504	111809623
AhGA20ox10	5	115930344	579898	581967
AhGA20ox11	15	160879708	156853202	156855372
AhGA20ox12	8	51897010	9746158	9750870
AhGA20ox13	9	120519698	109934556	109936402
AhGA20ox14	19	158625764	157819106	157820977
AhGA20ox15	17	134922436	125676796	125680962
AhGA3ox1	7	81119488	80306264	80308130
AhGA3ox2	8	51897010	46243859	46248346
AhGA3ox3	18	135150084	128331277	128335125
AhGA3ox4	9	120519698	1535856	1539204
AhGA3ox5	19	158625764	2104643	2107326
