# Supplementary material for: Genome-wide identification and expression analysis of GA20ox and GA3ox genes during pod development in peanut
Source: PeerJ. 2023 Oct 26;11:e16279. doi: 10.7717/peerj.16279 (PMC10615029; doi:10.7717/peerj.16279)
Supplement: Table S6 [file peerj-11-16279-s006.xlsx]

## Sheet: Sheet2
Table S6 the Nonsynonymous (Ka) / synonymous (Ks) ratios of the peanut GA20ox and GA3ox genes
	Sequence	Method	Ka	Ks	Ka/Ks	P-Value(Fisher)	Length	S-Sites	N-Sites	Fold-Sites(0:2:4)	Substitutions	S-Substitutions	N-Substitutions	Fold-S-Substitutions(0:2:4)	Fold-N-Substitutions(0:2:4)	Divergence-Time	Substitution-Rate-Ratio(rTC:rAG:rTA:rCG:rTG:rCA/rCA)	GC(1:2:3)	ML-Score	AICc	Akaike-Weight	Model
Ah-Ah	AhGA20ox1-AhGA20ox2	MA	0.0207335	0.125705	0.164938	3.11e-10	1116	260.485	855.515	NA	45	29.1884	15.8116	NA	NA	0.0452349	3.20474:3.26379:2.82381:3.45851:0.77613:1	0.406362(0.491935:0.356183:0.370968)	-1698.31	NA	NA	NA
	AhGA20ox1-AhGA20ox3	MA	0.0178932	0.117956	0.151693	3.07e-10	1116	266.245	849.755	NA	42	28.299	13.701	NA	NA	0.0417653	3.99525:3.73843:3.52422:3.68568:0.848956:1	0.40681(0.490591:0.356183:0.373656)	-1682.91	NA	NA	NA
	AhGA20ox1-AhGA20ox4	MA	0.00632324	0.010441	0.605618	0.326448	1116	281.358	834.642	NA	8	2.86067	5.13933	NA	NA	0.00736138	5.14939:5.16224:3.61275:3.56312:0.544872:1	0.409946(0.491935:0.357527:0.380376)	-1544.35	NA	NA	NA
	AhGA20ox2-AhGA20ox3	MA	0.00783661	0.0276734	0.283182	0.01347	1116	252.173	863.827	NA	13	6.59882	6.40118	NA	NA	0.012319	1.33762:1.15708:1.10289:1.39012:0.382376:1	0.40457(0.49328:0.354839:0.365591)	-1570.07	NA	NA	NA
	AhGA20ox2-AhGA20ox4	MA	0.0191533	0.118631	0.161453	1.02e-09	1116	257.966	858.034	NA	42	27.3257	14.6743	NA	NA	0.0421479	2.81668:2.92702:2.53825:3.17222:0.775291:1	0.407706(0.494624:0.356183:0.372312)	-1688.26	NA	NA	NA
	AhGA20ox3-AhGA20ox4	MA	0.0138741	0.110719	0.12531	1.8e-10	1116	266.481	849.519	NA	37	26.4385	10.5615	NA	NA	0.0369989	3.06025:2.92726:2.52942:2.8092:0.542684:1	0.408154(0.49328:0.356183:0.375)	-1660.7	NA	NA	NA
	AhGA20ox5-AhGA20ox6	MA	0.0150949	0.0791401	0.190736	6.44e-07	1137	250.553	886.447	NA	32	19.1066	12.8934	NA	NA	0.0292081	0.940385:0.918035:0.689474:0.70648:0.129943:1	0.451627(0.510554:0.382586:0.461741)	-1662.08	NA	NA	NA
	AhGA20ox7-AhGA20ox8	MA	0.0104857	0.0159093	0.659094	0.296753	1137	274.416	862.584	NA	13	4.23209	8.76791	NA	NA	0.0117947	27.2304:13.2033:22.8458:23.5593:8.17132:1	0.403694(0.505277:0.353562:0.352243)	-1599.85	NA	NA	NA
	AhGA20ox11-AhGA20ox9	MA	0.00720717	0.0598882	0.120344	3.5e-07	1146	267.865	878.135	NA	21	15.059	5.94105	NA	NA	0.0195208	3.11878:9.45992:4.2616:4.48808:0.277693:1	0.438482(0.46466:0.379581:0.471204)	-1654.98	NA	NA	NA
	AhGA3ox2-AhGA3ox3	MA	0.0139274	0.045932	0.303217	0.0018677	1056	230.599	825.401	NA	21	10.0704	10.9296	NA	NA	0.0209162	1.60678:1.74512:1.42706:1.40681:0.85579:1	0.419508(0.490057:0.375:0.393466)	-1535.39	NA	NA	NA
	AhGA3ox4-AhGA3ox5	MA	0.0105385	0.0570179	0.184828	3.1e-05	1083	241.917	841.083	NA	22	13.3934	8.60659	NA	NA	0.0209209	4.10381:3.52054:4.41169:4.49566:2.52373:1	0.465374(0.544321:0.404432:0.447368)	-1537.69	NA	NA	NA
Gm-Gm	Glyma03g02260-Glyma07g08950	MA	0.0279517	0.0995522	0.280774	4.93e-06	1134	250.974	883.026	NA	46	23.1403	22.8597	NA	NA	0.0437982	1.50681:1.92374:1.94489:1.96327:1.41006:1	0.425044(0.503968:0.363757:0.407407)	-1759.2	NA	NA	NA
	Glyma04g07520-Glyma06g07630	MA	0.0474392	0.215206	0.220436	3.71e-12	1023	249.533	773.467	NA	79	46.9324	32.0676	NA	NA	0.0883615	1.58026:1.49961:1.34317:1.371:0.750301:1	0.449658(0.508798:0.412023:0.428152)	-1726.63	NA	NA	NA
	Glyma09g27490-Glyma16g32550	MA	0.0875482	0.211028	0.414866	1.07e-06	1146	260.068	885.932	NA	117	48.4822	68.5178	NA	NA	0.11557	0.909261:1.36776:0.605076:0.619602:0.505191:1	0.439791(0.493455:0.383508:0.442408)	-2038.68	NA	NA	NA
	Glyma13g09460-Glyma14g25280	MA	0.0919851	0.289779	0.317432	5.18e-10	834	211.55	622.45	NA	101	52.2236	48.7764	NA	NA	0.142157	1.52067:1.54694:1.18472:1.10344:0.61006:1	0.480216(0.53777:0.384892:0.517986)	-1530.16	NA	NA	NA
	Glyma13g43850-Glyma15g01500	MA	0.0295454	0.125229	0.235932	3.84e-08	1056	260.598	795.402	NA	52	30.2305	21.7695	NA	NA	0.053158	1.77829:1.70448:1.91679:1.94481:1.21229:1	0.50947(0.576705:0.40767:0.544034)	-1681.46	NA	NA	NA
Ah-Gm	AhGA20ox7-Glyma03g02260	MA	0.150879	0.822769	0.18338	5.83e-52	1125	275.717	849.283	NA	240	153.368	86.6317	NA	NA	0.315547	1.80063:2.08712:1.23047:1.24133:0.609728:1	0.418222(0.510667:0.357333:0.386667)	-2268.04	NA	NA	NA
	AhGA20ox7-Glyma07g08950	MA	0.159045	0.797282	0.199484	8.15e-48	1128	269.449	858.551	NA	243	148.568	94.4325	NA	NA	0.311502	1.47102:1.89701:0.966065:0.976197:0.730149:1	0.411791(0.503989:0.356383:0.375)	-2292.49	NA	NA	NA
	AhGA20ox8-Glyma03g02260	MA	0.152733	0.811981	0.188099	2.69e-50	1125	274.356	850.644	NA	240	151.591	88.4087	NA	NA	0.313505	1.73708:2.12562:1.13544:1.18308:0.623765:1	0.417333(0.509333:0.357333:0.385333)	-2270.25	NA	NA	NA
	AhGA20ox8-Glyma07g08950	MA	0.157829	0.799308	0.197457	1.51e-48	1128	268.179	859.821	NA	242	148.187	93.8134	NA	NA	0.310339	1.37897:1.99535:0.828801:0.845309:0.755652:1	0.410904(0.50266:0.356383:0.37367)	-2288.37	NA	NA	NA
	AhGA20ox9-Glyma09g27490	MA	0.100493	0.900026	0.111656	1.72e-71	1143	275.878	867.122	NA	217	160.628	56.3723	NA	NA	0.293471	1.33028:1.58636:1.03597:1.06877:0.500454:1	0.439195(0.479003:0.375328:0.463255)	-2217.55	NA	NA	NA
	AhGA20ox9-Glyma16g32550	MA	0.168763	1.14943	0.146823	7.01e-81	1140	270.016	869.984	NA	277	188.044	88.9559	NA	NA	0.40104	1.06302:1.13809:0.867598:0.849763:0.467534:1	0.441228(0.478947:0.385526:0.459211)	-2375.9	NA	NA	NA
	AhGA20ox11-Glyma09g27490	MA	0.099505	0.865002	0.115034	3.59e-68	1143	276.621	866.379	NA	213	156.584	56.4156	NA	NA	0.284766	1.30149:1.65246:0.978611:0.964216:0.480957:1	0.437008(0.47769:0.377953:0.455381)	-2211.7	NA	NA	NA
	AhGA20ox11-Glyma16g32550	MA	0.164704	1.07191	0.153655	2.6e-74	1140	273.458	866.542	NA	271	182.258	88.7423	NA	NA	0.382321	1.24373:1.32102:0.960092:0.955671:0.494153:1	0.439035(0.477632:0.388158:0.451316)	-2367.92	NA	NA	NA
	AhGA20ox12-AhGA20ox15	MA	0.00644566	0.0301035	0.214116	0.00593102	1089	276.265	812.735	NA	13	7.97593	5.02407	NA	NA	0.0124473	3.00203:2.9865:2.42493:2.44526:0.858593:1	0.435721(0.488981:0.384298:0.433884)	-1550.36	NA	NA	NA
	AhGA20ox12-Glyma13g09460	MA	0.233623	1.05496	0.221453	1.3e-48	882	225.243	656.757	NA	249	151.303	97.6969	NA	NA	0.443374	1.61424:1.67681:1.32754:1.34394:0.634888:1	0.455215(0.52551:0.382653:0.457483)	-1936.97	NA	NA	NA
	AhGA20ox12-Glyma14g25280	MA	0.188922	0.925438	0.204144	6.47e-53	1032	259.561	772.439	NA	259	161.118	97.8823	NA	NA	0.374165	1.66641:1.85351:1.27138:1.3546:0.59347:1	0.465601(0.508721:0.388081:0.5)	-2183.78	NA	NA	NA
	AhGA20ox13-AhGA20ox14	MA	0.0162149	0.0669783	0.242092	3.16e-05	1134	297.173	836.827	NA	31	18.4335	12.5665	NA	NA	0.0295178	2.82017:2.09604:1.879:1.98566:0.65607:1	0.460758(0.503968:0.375661:0.502646)	-1699.88	NA	NA	NA
	AhGA20ox13-Glyma20g29210	MA	0.104559	0.794307	0.131635	5.79e-59	1113	268.349	844.651	NA	206	145.652	60.3482	NA	NA	0.27086	0.914549:0.938956:0.735228:0.935049:0.278709:1	0.461815(0.516173:0.392183:0.477089)	-2176.63	NA	NA	NA
	AhGA20ox14-Glyma20g29210	MA	0.104797	0.752943	0.139183	1.32e-54	1113	268.733	844.267	NA	200	139.153	60.8468	NA	NA	0.261291	1.02597:1.02653:0.851061:1.00818:0.342833:1	0.464061(0.510782:0.392183:0.489218)	-2163.35	NA	NA	NA
	AhGA20ox15-Glyma13g09460	MA	0.2346	1.1439	0.205088	5.03e-55	882	225.071	656.929	NA	253	158.263	94.7368	NA	NA	0.466638	1.73955:1.76605:1.4878:1.52127:0.684698:1	0.454082(0.52551:0.384354:0.452381)	-1938.29	NA	NA	NA
	AhGA20ox15-Glyma14g25280	MA	0.188597	0.962563	0.195933	2.88e-56	1032	260.14	771.86	NA	261	165.049	95.9512	NA	NA	0.383694	1.72011:1.83205:1.33928:1.41327:0.580532:1	0.464147(0.507267:0.389535:0.49564)	-2185.8	NA	NA	NA
	AhGA3ox1-Glyma13g43850	MA	0.137112	0.80906	0.169471	5.72e-53	1053	255.205	797.795	NA	224	146.426	77.574	NA	NA	0.299965	1.44628:2.39515:1.61429:1.58157:0.949173:1	0.517992(0.56392:0.417614:0.572443)	-2137.34	NA	NA	NA
	AhGA3ox1-Glyma15g01500	MA	0.119703	0.805149	0.148672	1.71e-56	1050	261.65	788.35	NA	213	147.105	65.8953	NA	NA	0.290509	1.55121:2.57407:1.47529:1.4162:0.688553:1	0.51377(0.561254:0.415954:0.564103)	-2095.89	NA	NA	NA
	AhGA3ox2-Glyma04g07520	MA	0.171217	1.03647	0.165192	1.85e-63	1023	228.185	794.815	NA	245	155.516	89.4838	NA	NA	0.364215	1.14218:1.79712:1.2555:1.24097:0.785311:1	0.434506(0.495601:0.394428:0.41349)	-2138.26	NA	NA	NA
	AhGA3ox2-Glyma06g07630	MA	0.172799	1.10253	0.156729	2.89e-71	1035	236.093	798.907	NA	256	167.282	88.7179	NA	NA	0.38488	1.38479:2.11846:1.28412:1.2267:0.687595:1	0.434783(0.502899:0.391304:0.410145)	-2161.94	NA	NA	NA
	AhGA3ox3-Glyma04g07520	MA	0.173828	1.00851	0.172361	6.98e-61	1023	233.189	789.811	NA	246	155.324	90.6759	NA	NA	0.36409	1.1847:1.82235:1.03397:1.00261:0.798679:1	0.432063(0.489736:0.395894:0.410557)	-2143	NA	NA	NA
	AhGA3ox3-Glyma06g07630	MA	0.18128	1.03287	0.175511	2.58e-63	1038	235.778	802.222	NA	258	161.536	96.464	NA	NA	0.374716	1.03461:1.74155:0.942344:0.740439:0.596915:1	0.433044(0.495665:0.393064:0.410405)	-2186.79	NA	NA	NA
