# Supplementary material for: Genome-wide identification and expression analysis of GA20ox and GA3ox genes during pod development in peanut
Source: PeerJ. 2023 Oct 26;11:e16279. doi: 10.7717/peerj.16279 (PMC10615029; doi:10.7717/peerj.16279)
Supplement: Table S7 [file peerj-11-16279-s007.xlsx]

## Sheet: string_interactions_short
Table S7 protein-protein interaction results
#node1	node2	node1_string_id	node2_string_id	neighborhood_on_chromosome	gene_fusion	phylogenetic_cooccurrence	homology	coexpression	experimentally_determined_interaction	database_annotated	automated_textmining	combined_score
A0A444XWP4	AhGA20ox10	3818.A0A444XWP4	3818.A0A444WVW1	0	0	0.288	0.388	0	0	0.99	0.407	0.994
A0A444XWP4	AhGA3ox5	3818.A0A444XWP4	3818.A0A444XC41	0	0	0.288	0.386	0	0	0.929	0.375	0.953
A0A444XWP4	AhGA20ox14	3818.A0A444XWP4	3818.A0A444XW01	0	0	0.188	0.433	0	0	0.928	0.363	0.947
A0A444XWP4	AhGA3ox3	3818.A0A444XWP4	3818.A0A444XY92	0	0	0.207	0.389	0	0	0.919	0.315	0.94
A0A444XWP4	A0A444YUS4	3818.A0A444XWP4	3818.A0A444YUS4	0	0	0.207	0.376	0	0	0.919	0.315	0.941
A0A444XWP4	AhGA20ox11	3818.A0A444XWP4	3818.A0A444YXZ1	0	0	0.188	0.433	0	0	0.928	0.218	0.941
A0A444XWP4	AhGA20ox8	3818.A0A444XWP4	3818.A0A444ZLJ9	0	0	0.288	0.391	0	0	0.99	0.407	0.994
A0A444XWP4	AhGA3ox4	3818.A0A444XWP4	3818.A0A445BQD2	0	0	0.288	0.388	0	0	0.929	0.375	0.953
A0A444XWP4	AhGA3ox2	3818.A0A444XWP4	3818.A0A445C0P1	0	0	0.207	0.387	0	0	0.919	0.315	0.94
A0A444XWP4	AhGA20ox12	3818.A0A444XWP4	3818.A0A445CA85	0	0	0.223	0.413	0	0	0	0.532	0.404
A0A444XWP4	AhGA3ox1	3818.A0A444XWP4	3818.A0A445CIK3	0	0	0.176	0.391	0	0	0.98	0.445	0.986
A0A444XWP4	A0A445CW03	3818.A0A444XWP4	3818.A0A445CW03	0	0	0.207	0.376	0	0	0.919	0.315	0.941
A0A444XWP4	AhGA20ox9	3818.A0A444XWP4	3818.A0A445CZN3	0	0	0.188	0.433	0	0	0.928	0.218	0.941
A0A444XWP4	AhGA20ox7	3818.A0A444XWP4	3818.A0A445DDU7	0	0	0.288	0.391	0	0	0.99	0.407	0.994
A0A444XWP4	AhGA20ox1	3818.A0A444XWP4	3818.A0A445E5Z4	0	0	0.288	0.428	0	0	0.99	0.407	0.993
A0A444XWP4	AhGA20ox2	3818.A0A444XWP4	3818.A0A445E6K0	0	0	0.288	0.411	0	0	0.99	0.407	0.993
A0A444XWP4	AhGA20ox4	3818.A0A444XWP4	3818.A0A445E9A9	0	0	0.288	0.428	0	0	0.99	0.407	0.993
A0A444XWP4	AhGA20ox3	3818.A0A444XWP4	3818.A0A445E9C9	0	0	0.288	0.428	0	0	0.99	0.407	0.993
A0A444Y5G9	AhGA20ox10	3818.A0A444Y5G9	3818.A0A444WVW1	0	0	0.183	0.396	0	0	0.975	0	0.977
A0A444Y5G9	AhGA3ox5	3818.A0A444Y5G9	3818.A0A444XC41	0	0	0.151	0.445	0	0	0.907	0.271	0.925
A0A444Y5G9	AhGA20ox14	3818.A0A444Y5G9	3818.A0A444XW01	0	0	0.197	0.423	0	0	0.905	0.266	0.926
A0A444Y5G9	AhGA3ox3	3818.A0A444Y5G9	3818.A0A444XY92	0	0	0.138	0.393	0	0	0.897	0.21	0.914
A0A444Y5G9	A0A444YUS4	3818.A0A444Y5G9	3818.A0A444YUS4	0	0	0.138	0.391	0	0	0.897	0.21	0.914
A0A444Y5G9	AhGA20ox11	3818.A0A444Y5G9	3818.A0A444YXZ1	0	0	0.197	0.423	0	0	0.905	0.266	0.926
A0A444Y5G9	AhGA20ox8	3818.A0A444Y5G9	3818.A0A444ZLJ9	0	0	0.183	0.42	0	0	0.975	0	0.977
A0A444Y5G9	AhGA3ox4	3818.A0A444Y5G9	3818.A0A445BQD2	0	0	0.151	0.452	0	0	0.907	0.271	0.924
A0A444Y5G9	AhGA3ox2	3818.A0A444Y5G9	3818.A0A445C0P1	0	0	0.138	0.393	0	0	0.897	0.21	0.914
A0A444Y5G9	AhGA3ox1	3818.A0A444Y5G9	3818.A0A445CIK3	0	0	0.15	0.447	0	0	0.944	0.271	0.954
A0A444Y5G9	A0A445CW03	3818.A0A444Y5G9	3818.A0A445CW03	0	0	0.138	0.391	0	0	0.897	0.21	0.914
A0A444Y5G9	AhGA20ox9	3818.A0A444Y5G9	3818.A0A445CZN3	0	0	0.197	0.418	0	0	0.905	0.266	0.926
A0A444Y5G9	AhGA20ox7	3818.A0A444Y5G9	3818.A0A445DDU7	0	0	0.183	0.413	0	0	0.975	0	0.977
A0A444Y5G9	AhGA20ox1	3818.A0A444Y5G9	3818.A0A445E5Z4	0	0	0.183	0.437	0	0	0.975	0	0.977
A0A444Y5G9	AhGA20ox2	3818.A0A444Y5G9	3818.A0A445E6K0	0	0	0.183	0.413	0	0	0.975	0	0.977
A0A444Y5G9	AhGA20ox4	3818.A0A444Y5G9	3818.A0A445E9A9	0	0	0.183	0.433	0	0	0.975	0	0.977
A0A444Y5G9	AhGA20ox3	3818.A0A444Y5G9	3818.A0A445E9C9	0	0	0.183	0.423	0	0	0.975	0	0.977
A0A444YUS4	AhGA3ox5	3818.A0A444YUS4	3818.A0A444XC41	0	0	0	0.834	0	0	0.862	0	0.862
A0A444YUS4	AhGA20ox14	3818.A0A444YUS4	3818.A0A444XW01	0	0	0.219	0.423	0	0	0.98	0	0.982
A0A444YUS4	AhGA20ox11	3818.A0A444YUS4	3818.A0A444YXZ1	0	0	0.219	0.441	0	0	0.98	0	0.982
A0A444YUS4	AhGA3ox4	3818.A0A444YUS4	3818.A0A445BQD2	0	0	0	0.834	0	0	0.862	0	0.862
A0A444YUS4	A0A445BYM0	3818.A0A444YUS4	3818.A0A445BYM0	0	0	0.138	0.394	0	0	0.897	0.21	0.914
A0A444YUS4	AhGA3ox1	3818.A0A444YUS4	3818.A0A445CIK3	0	0	0.359	0.835	0	0	0.988	0	0.989
A0A444YUS4	AhGA20ox9	3818.A0A444YUS4	3818.A0A445CZN3	0	0	0.219	0.445	0	0	0.98	0	0.982
A0A445BYM0	AhGA20ox10	3818.A0A445BYM0	3818.A0A444WVW1	0	0	0.183	0.413	0	0	0.975	0	0.977
A0A445BYM0	AhGA3ox5	3818.A0A445BYM0	3818.A0A444XC41	0	0	0.151	0.449	0	0	0.907	0.271	0.924
A0A445BYM0	AhGA20ox14	3818.A0A445BYM0	3818.A0A444XW01	0	0	0.197	0.435	0	0	0.905	0.266	0.925
A0A445BYM0	AhGA3ox3	3818.A0A445BYM0	3818.A0A444XY92	0	0	0.138	0.418	0	0	0.897	0.21	0.913
A0A445BYM0	AhGA20ox11	3818.A0A445BYM0	3818.A0A444YXZ1	0	0	0.197	0.435	0	0	0.905	0.266	0.925
A0A445BYM0	AhGA20ox8	3818.A0A445BYM0	3818.A0A444ZLJ9	0	0	0.183	0.441	0	0	0.975	0	0.977
A0A445BYM0	AhGA3ox4	3818.A0A445BYM0	3818.A0A445BQD2	0	0	0.151	0.462	0	0	0.907	0.271	0.924
A0A445BYM0	AhGA3ox2	3818.A0A445BYM0	3818.A0A445C0P1	0	0	0.138	0.418	0	0	0.897	0.21	0.913
A0A445BYM0	AhGA3ox1	3818.A0A445BYM0	3818.A0A445CIK3	0	0	0.15	0.454	0	0	0.944	0.271	0.954
A0A445BYM0	A0A445CW03	3818.A0A445BYM0	3818.A0A445CW03	0	0	0.138	0.395	0	0	0.897	0.21	0.914
A0A445BYM0	AhGA20ox9	3818.A0A445BYM0	3818.A0A445CZN3	0	0	0.197	0.43	0	0	0.905	0.266	0.925
A0A445BYM0	AhGA20ox7	3818.A0A445BYM0	3818.A0A445DDU7	0	0	0.183	0.435	0	0	0.975	0	0.977
A0A445BYM0	AhGA20ox1	3818.A0A445BYM0	3818.A0A445E5Z4	0	0	0.183	0.443	0	0	0.975	0	0.977
A0A445BYM0	AhGA20ox2	3818.A0A445BYM0	3818.A0A445E6K0	0	0	0.183	0.425	0	0	0.975	0	0.977
A0A445BYM0	AhGA20ox4	3818.A0A445BYM0	3818.A0A445E9A9	0	0	0.183	0.443	0	0	0.975	0	0.977
A0A445BYM0	AhGA20ox3	3818.A0A445BYM0	3818.A0A445E9C9	0	0	0.183	0.439	0	0	0.975	0	0.977
A0A445CW03	AhGA3ox5	3818.A0A445CW03	3818.A0A444XC41	0	0	0	0.834	0	0	0.862	0	0.862
A0A445CW03	AhGA20ox14	3818.A0A445CW03	3818.A0A444XW01	0	0	0.219	0.445	0	0	0.98	0	0.982
A0A445CW03	AhGA20ox11	3818.A0A445CW03	3818.A0A444YXZ1	0	0	0.219	0.458	0	0	0.98	0	0.982
A0A445CW03	AhGA3ox4	3818.A0A445CW03	3818.A0A445BQD2	0	0	0	0.824	0	0	0.862	0	0.862
A0A445CW03	AhGA3ox1	3818.A0A445CW03	3818.A0A445CIK3	0	0	0.359	0.835	0	0	0.988	0	0.989
A0A445CW03	AhGA20ox9	3818.A0A445CW03	3818.A0A445CZN3	0	0	0.219	0.466	0	0	0.98	0	0.982
AhGA20ox1	AhGA3ox5	3818.A0A445E5Z4	3818.A0A444XC41	0	0	0.248	0.454	0	0	0.769	0	0.796
AhGA20ox1	AhGA3ox4	3818.A0A445E5Z4	3818.A0A445BQD2	0	0	0.248	0.462	0	0	0.769	0	0.796
AhGA20ox1	AhGA3ox1	3818.A0A445E5Z4	3818.A0A445CIK3	0	0	0.159	0.449	0	0	0.9	0.213	0.916
AhGA20ox10	AhGA3ox5	3818.A0A444WVW1	3818.A0A444XC41	0	0	0.248	0.451	0	0	0.769	0	0.796
AhGA20ox10	AhGA3ox4	3818.A0A444WVW1	3818.A0A445BQD2	0	0	0.248	0.452	0	0	0.769	0	0.796
AhGA20ox10	AhGA3ox1	3818.A0A444WVW1	3818.A0A445CIK3	0	0	0.159	0.481	0	0	0.9	0.213	0.915
AhGA20ox11	AhGA3ox5	3818.A0A444YXZ1	3818.A0A444XC41	0	0	0.335	0.451	0	0	0.989	0.234	0.992
AhGA20ox11	AhGA3ox3	3818.A0A444YXZ1	3818.A0A444XY92	0	0	0.219	0.443	0	0	0.98	0	0.982
AhGA20ox11	AhGA3ox4	3818.A0A444YXZ1	3818.A0A445BQD2	0	0	0.335	0.458	0	0	0.989	0.234	0.992
AhGA20ox11	AhGA3ox2	3818.A0A444YXZ1	3818.A0A445C0P1	0	0	0.219	0.441	0	0	0.98	0	0.982
AhGA20ox11	AhGA3ox1	3818.A0A444YXZ1	3818.A0A445CIK3	0	0	0.192	0.471	0	0	0.992	0.432	0.994
AhGA20ox14	AhGA3ox5	3818.A0A444XW01	3818.A0A444XC41	0	0	0.335	0.454	0	0	0.989	0.234	0.992
AhGA20ox14	AhGA3ox3	3818.A0A444XW01	3818.A0A444XY92	0	0	0.219	0.449	0	0	0.98	0	0.982
AhGA20ox14	AhGA3ox4	3818.A0A444XW01	3818.A0A445BQD2	0	0	0.335	0.451	0	0	0.989	0.234	0.992
AhGA20ox14	AhGA3ox2	3818.A0A444XW01	3818.A0A445C0P1	0	0	0.219	0.449	0	0	0.98	0	0.982
AhGA20ox14	AhGA3ox1	3818.A0A444XW01	3818.A0A445CIK3	0	0	0.192	0.468	0	0	0.992	0.432	0.994
AhGA20ox2	AhGA3ox5	3818.A0A445E6K0	3818.A0A444XC41	0	0	0.248	0.443	0	0	0.769	0	0.797
AhGA20ox2	AhGA3ox4	3818.A0A445E6K0	3818.A0A445BQD2	0	0	0.248	0.452	0	0	0.769	0	0.796
AhGA20ox2	AhGA3ox1	3818.A0A445E6K0	3818.A0A445CIK3	0	0	0.159	0.443	0	0	0.9	0.213	0.916
AhGA20ox3	AhGA3ox5	3818.A0A445E9C9	3818.A0A444XC41	0	0	0.248	0.451	0	0	0.769	0	0.796
AhGA20ox3	AhGA3ox4	3818.A0A445E9C9	3818.A0A445BQD2	0	0	0.248	0.458	0	0	0.769	0	0.796
AhGA20ox3	AhGA3ox1	3818.A0A445E9C9	3818.A0A445CIK3	0	0	0.159	0.443	0	0	0.9	0.213	0.916
AhGA20ox4	AhGA3ox5	3818.A0A445E9A9	3818.A0A444XC41	0	0	0.248	0.452	0	0	0.769	0	0.796
AhGA20ox4	AhGA3ox4	3818.A0A445E9A9	3818.A0A445BQD2	0	0	0.248	0.462	0	0	0.769	0	0.796
AhGA20ox4	AhGA3ox1	3818.A0A445E9A9	3818.A0A445CIK3	0	0	0.159	0.451	0	0	0.9	0.213	0.916
AhGA20ox7	AhGA3ox5	3818.A0A445DDU7	3818.A0A444XC41	0	0	0.248	0.411	0	0	0.769	0	0.798
AhGA20ox7	AhGA3ox4	3818.A0A445DDU7	3818.A0A445BQD2	0	0	0.248	0.42	0	0	0.769	0	0.798
AhGA20ox7	AhGA3ox1	3818.A0A445DDU7	3818.A0A445CIK3	0	0	0.159	0.447	0	0	0.9	0.213	0.916
AhGA20ox8	AhGA3ox5	3818.A0A444ZLJ9	3818.A0A444XC41	0	0	0.248	0.411	0	0	0.769	0	0.798
AhGA20ox8	AhGA3ox4	3818.A0A444ZLJ9	3818.A0A445BQD2	0	0	0.248	0.42	0	0	0.769	0	0.798
AhGA20ox8	AhGA3ox1	3818.A0A444ZLJ9	3818.A0A445CIK3	0	0	0.159	0.447	0	0	0.9	0.213	0.916
AhGA20ox9	AhGA3ox5	3818.A0A445CZN3	3818.A0A444XC41	0	0	0.335	0.451	0	0	0.989	0.234	0.992
AhGA20ox9	AhGA3ox3	3818.A0A445CZN3	3818.A0A444XY92	0	0	0.219	0.441	0	0	0.98	0	0.982
AhGA20ox9	AhGA3ox4	3818.A0A445CZN3	3818.A0A445BQD2	0	0	0.335	0.458	0	0	0.989	0.234	0.992
AhGA20ox9	AhGA3ox2	3818.A0A445CZN3	3818.A0A445C0P1	0	0	0.219	0.437	0	0	0.98	0	0.982
AhGA20ox9	AhGA3ox1	3818.A0A445CZN3	3818.A0A445CIK3	0	0	0.192	0.471	0	0	0.992	0.432	0.994
AhGA3ox1	AhGA3ox3	3818.A0A445CIK3	3818.A0A444XY92	0	0	0.359	0.859	0	0	0.988	0	0.989
AhGA3ox1	AhGA3ox2	3818.A0A445CIK3	3818.A0A445C0P1	0	0	0.359	0.862	0	0	0.988	0	0.989
AhGA3ox2	AhGA3ox5	3818.A0A445C0P1	3818.A0A444XC41	0	0	0	0.866	0	0	0.862	0	0.862
AhGA3ox2	AhGA3ox4	3818.A0A445C0P1	3818.A0A445BQD2	0	0	0	0.852	0	0	0.862	0	0.862
AhGA3ox3	AhGA3ox5	3818.A0A444XY92	3818.A0A444XC41	0	0	0	0.862	0	0	0.862	0	0.862
AhGA3ox3	AhGA3ox4	3818.A0A444XY92	3818.A0A445BQD2	0	0	0	0.85	0	0	0.862	0	0.862

## Sheet: string_protein_annotations
#node	identifier	domain_summary_url	annotation	other_names_and_aliases
A0A444XWP4	3818.A0A444XWP4	Fe2OG dioxygenase domain-containing protein; Belongs to the iron/ascorbate-dependent oxidoreductase family.	domain annotation not available for this species	A0A444XWP4,A0A444XWP4_ARAHY,Ahy_B09g100065,Fe2OG dioxygenase domain-containing protein
A0A444Y5G9	3818.A0A444Y5G9	Fe2OG dioxygenase domain-containing protein; Belongs to the iron/ascorbate-dependent oxidoreductase family.	domain annotation not available for this species	A0A444Y5G9,A0A444Y5G9_ARAHY,Ahy_B08g093166,Fe2OG dioxygenase domain-containing protein
A0A444YUS4	3818.A0A444YUS4	Fe2OG dioxygenase domain-containing protein; Belongs to the iron/ascorbate-dependent oxidoreductase family.	domain annotation not available for this species	A0A444YUS4,A0A444YUS4_ARAHY,Ahy_B06g085507,Fe2OG dioxygenase domain-containing protein
A0A445BYM0	3818.A0A445BYM0	Fe2OG dioxygenase domain-containing protein; Belongs to the iron/ascorbate-dependent oxidoreductase family.	domain annotation not available for this species	A0A445BYM0,A0A445BYM0_ARAHY,Ahy_A08g040018,Fe2OG dioxygenase domain-containing protein
A0A445CW03	3818.A0A445CW03	Fe2OG dioxygenase domain-containing protein; Belongs to the iron/ascorbate-dependent oxidoreductase family.	domain annotation not available for this species	A0A445CW03,A0A445CW03_ARAHY,Ahy_A06g030353,Fe2OG dioxygenase domain-containing protein
AhGA20ox1	3818.A0A445E5Z4	Fe2OG dioxygenase domain-containing protein; Belongs to the iron/ascorbate-dependent oxidoreductase family.	domain annotation not available for this species	A0A445E5Z4,A0A445E5Z4_ARAHY,AhGA20ox1,Ahy_A02g005171,Fe2OG dioxygenase domain-containing protein
AhGA20ox10	3818.A0A444WVW1	Fe2OG dioxygenase domain-containing protein; Belongs to the iron/ascorbate-dependent oxidoreductase family.	domain annotation not available for this species	A0A444WVW1,A0A444WVW1_ARAHY,AhGA20ox10,Ahy_Scaffold1g107476,Fe2OG dioxygenase domain-containing protein
AhGA20ox11	3818.A0A444YXZ1	Fe2OG dioxygenase domain-containing protein; Belongs to the iron/ascorbate-dependent oxidoreductase family.	domain annotation not available for this species	A0A444YXZ1,A0A444YXZ1_ARAHY,AhGA20ox11,Ahy_B05g074118,Fe2OG dioxygenase domain-containing protein
AhGA20ox12	3818.A0A445CA85	Fe2OG dioxygenase domain-containing protein; Belongs to the iron/ascorbate-dependent oxidoreductase family.	domain annotation not available for this species	A0A445CA85,A0A445CA85_ARAHY,AhGA20ox12,Ahy_A07g033832,Fe2OG dioxygenase domain-containing protein
AhGA20ox14	3818.A0A444XW01	Fe2OG dioxygenase domain-containing protein; Belongs to the iron/ascorbate-dependent oxidoreductase family.	domain annotation not available for this species	A0A444XW01,A0A444XW01_ARAHY,AhGA20ox14,Ahy_B09g100190,Fe2OG dioxygenase domain-containing protein
AhGA20ox2	3818.A0A445E6K0	Fe2OG dioxygenase domain-containing protein; Belongs to the iron/ascorbate-dependent oxidoreductase family.	domain annotation not available for this species	A0A445E6K0,A0A445E6K0_ARAHY,AhGA20ox2,Ahy_A02g005264,Fe2OG dioxygenase domain-containing protein
AhGA20ox3	3818.A0A445E9C9	Fe2OG dioxygenase domain-containing protein; Belongs to the iron/ascorbate-dependent oxidoreductase family.	domain annotation not available for this species	A0A445E9C9,A0A445E9C9_ARAHY,AhGA20ox3,Ahy_A02g006153,Fe2OG dioxygenase domain-containing protein
AhGA20ox4	3818.A0A445E9A9	Fe2OG dioxygenase domain-containing protein; Belongs to the iron/ascorbate-dependent oxidoreductase family.	domain annotation not available for this species	A0A445E9A9,A0A445E9A9_ARAHY,AhGA20ox4,Ahy_A02g006065,Fe2OG dioxygenase domain-containing protein
AhGA20ox5	3818.A0A445DSP6	Fe2OG dioxygenase domain-containing protein; Belongs to the iron/ascorbate-dependent oxidoreductase family.	domain annotation not available for this species	A0A445DSP6,A0A445DSP6_ARAHY,AhGA20ox5,Ahy_A03g012180,Fe2OG dioxygenase domain-containing protein
AhGA20ox7	3818.A0A445DDU7	Fe2OG dioxygenase domain-containing protein; Belongs to the iron/ascorbate-dependent oxidoreductase family.	domain annotation not available for this species	A0A445DDU7,A0A445DDU7_ARAHY,AhGA20ox7,Ahy_A04g018507,Fe2OG dioxygenase domain-containing protein
AhGA20ox8	3818.A0A444ZLJ9	Fe2OG dioxygenase domain-containing protein; Belongs to the iron/ascorbate-dependent oxidoreductase family.	domain annotation not available for this species	A0A444ZLJ9,A0A444ZLJ9_ARAHY,AhGA20ox8,Ahy_B04g071784,Fe2OG dioxygenase domain-containing protein
AhGA20ox9	3818.A0A445CZN3	Fe2OG dioxygenase domain-containing protein; Belongs to the iron/ascorbate-dependent oxidoreductase family.	domain annotation not available for this species	A0A445CZN3,A0A445CZN3_ARAHY,AhGA20ox9,Ahy_A05g022088,Fe2OG dioxygenase domain-containing protein
AhGA3ox1	3818.A0A445CIK3	Fe2OG dioxygenase domain-containing protein; Belongs to the iron/ascorbate-dependent oxidoreductase family.	domain annotation not available for this species	A0A445CIK3,A0A445CIK3_ARAHY,AhGA3ox1,Ahy_A07g037374,Fe2OG dioxygenase domain-containing protein
AhGA3ox2	3818.A0A445C0P1	Fe2OG dioxygenase domain-containing protein; Belongs to the iron/ascorbate-dependent oxidoreductase family.	domain annotation not available for this species	A0A445C0P1,A0A445C0P1_ARAHY,AhGA3ox2,Ahy_A08g040809,Fe2OG dioxygenase domain-containing protein
AhGA3ox3	3818.A0A444XY92	Fe2OG dioxygenase domain-containing protein; Belongs to the iron/ascorbate-dependent oxidoreductase family.	domain annotation not available for this species	A0A444XY92,A0A444XY92_ARAHY,AhGA3ox3,Ahy_B08g089553,Fe2OG dioxygenase domain-containing protein
AhGA3ox4	3818.A0A445BQD2	Fe2OG dioxygenase domain-containing protein; Belongs to the iron/ascorbate-dependent oxidoreductase family.	domain annotation not available for this species	A0A445BQD2,A0A445BQD2_ARAHY,AhGA3ox4,Ahy_A09g046613,Fe2OG dioxygenase domain-containing protein
AhGA3ox5	3818.A0A444XC41	Fe2OG dioxygenase domain-containing protein; Belongs to the iron/ascorbate-dependent oxidoreductase family.	domain annotation not available for this species	A0A444XC41,A0A444XC41_ARAHY,AhGA3ox5,Ahy_B09g094759,Fe2OG dioxygenase domain-containing protein
