# Supplementary material for: Genome-wide identification and expression analysis of GA20ox and GA3ox genes during pod development in peanut
Source: PeerJ. 2023 Oct 26;11:e16279. doi: 10.7717/peerj.16279 (PMC10615029; doi:10.7717/peerj.16279)
Supplement: Table S8 [file peerj-11-16279-s008.xlsx]

## Sheet: result(pod)
Table S7 Heatmap data of GA20ox and GA3ox genes in different pod development stage
GeneID	S1	S2	S3	S4	S5	S6
GA20ox3/GA20ox2	0.0687243	0.189319	0.241566	0.786196	14.4821	168.438
GA20ox4/ GA20ox1	68.4297	55.6709	57.7983	71.6648	49.2383	40.2207
GA20ox6/GA20ox5	0.333152	0.319958	0.655255	1.49272	23.3922	1393.15
GA20ox7/GA20ox8	0.510666	0.465557	0.486115	0.411772	1.02187	1.57648
GA20ox9/GA20ox11	2.69312	15.2028	26.1874	48.4483	43.7935	1.34153
GA20ox10	0.351836	0.491649	5.76606	42.4274	319.934	2655.04
GA20ox13/GA20ox14	4.6896	36.6535	69.7681	42.6268	19.9104	48.395
GA20ox15/GA20ox12	381.186	334.826	78.3903	71.2914	93.5583	0.148512
GA3ox1	8.85737	9.22199	4.44825	2.12072	0.499874	0.385084
GA3ox2/GA3ox3	0.532079	2.23922	0.612428	1.89204	0.817946	1
GA3ox4/GA3ox5	46.641	17.4679	8.59035	25.8398	21.2801	17.0862
