# Supplementary material for: Genome-wide identification and expression analysis of GA20ox and GA3ox genes during pod development in peanut
Source: PeerJ. 2023 Oct 26;11:e16279. doi: 10.7717/peerj.16279 (PMC10615029; doi:10.7717/peerj.16279)
Supplement: Table S9 [file peerj-11-16279-s009.xlsx]

## Sheet: result(different tissue)
			Table S8 Heatmap data of GA20ox and GA3ox genes in different tissues
			GeneID	stem	leaf	flower	inflorescence
			GA20ox3/GA20ox2	0.724131	0.0670816	1.03334	0.234671
			GA20ox4/ GA20ox1	69.5258	74.1439	67.6804	64.3231
			GA20ox6/GA20ox5	444.993	58.0253	1238.9	50.4869
			GA20ox7/GA20ox8	2.2701	0.152051	15.5995	0.187991
			GA20ox9/GA20ox11	225.343	128.052	13.2734	24.115
			GA20ox10	0.920793	0.1204	1.72682	7.69913
			GA20ox13/GA20ox14	175.862	92.7187	204.25	106.426
			GA20ox15/GA20ox12	2.55893	13.12	6.7469	11.4489
			GA3ox1	10.3639	11.5633	1.22625	16.2383
			GA3ox2/GA3ox3	1	1.80501	69.4482	46.4256
			GA3ox4/GA3ox5	569.053	201.842	10.9665	203.675
